# Supplementary material for: Tropical Atlantic climate and ecosystem regime shifts during the Paleocene–Eocene Thermal Maximum
Source: Copernicus journal article supplement (doi:10.5194/cp-14-39-2018), 2018-01-15
Supplement: Supplementary file 1 [file cp-14-39-2018-supplement.zip]

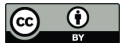

## *Supplement of*

# **Tropical Atlantic climate and ecosystem regime shifts during the Paleocene–Eocene Thermal Maximum**

**Joost Frieling et al.**

*Correspondence to:* Joost Frieling (j.frieling1@uu.nl)

- cp-14-39-2018-supplement-title-page.pdf
- Table 1.xlsx

The copyright of individual parts of the supplement might differ from the CC BY 3.0 License.
